# Supplementary material for: A highly efficient yet stable salamo-type fluorescent chemosensor with multiple responses to Cu2+and S2−
Source: Royal Society of Chemistry journal article supplement (doi:10.1039/d1nj02763h), 2021-01-01
Supplement: d1nj02763h1.pdf [file d1nj02763h1.pdf]

## Supporting Information

### **A highly efficient yet stable salamo-type fluorescent chemosensor for multiple responses to Cu<sup>2+</sup> and S<sup>2-</sup>**

Guang-Xu Yao, Peng Li, Jin-Qiang Zhang, Li Wang, Hui Liu and Wen-Kui Dong \*

School of Chemistry and Chemical Engineering, Lanzhou Jiaotong University, Lanzhou, Gansu 730070, China

\* Corresponding author. E-mail: dongwk@126.com. Fax: (+86) 931-4938703 (Prof. Dr. Wen-Kui Dong).

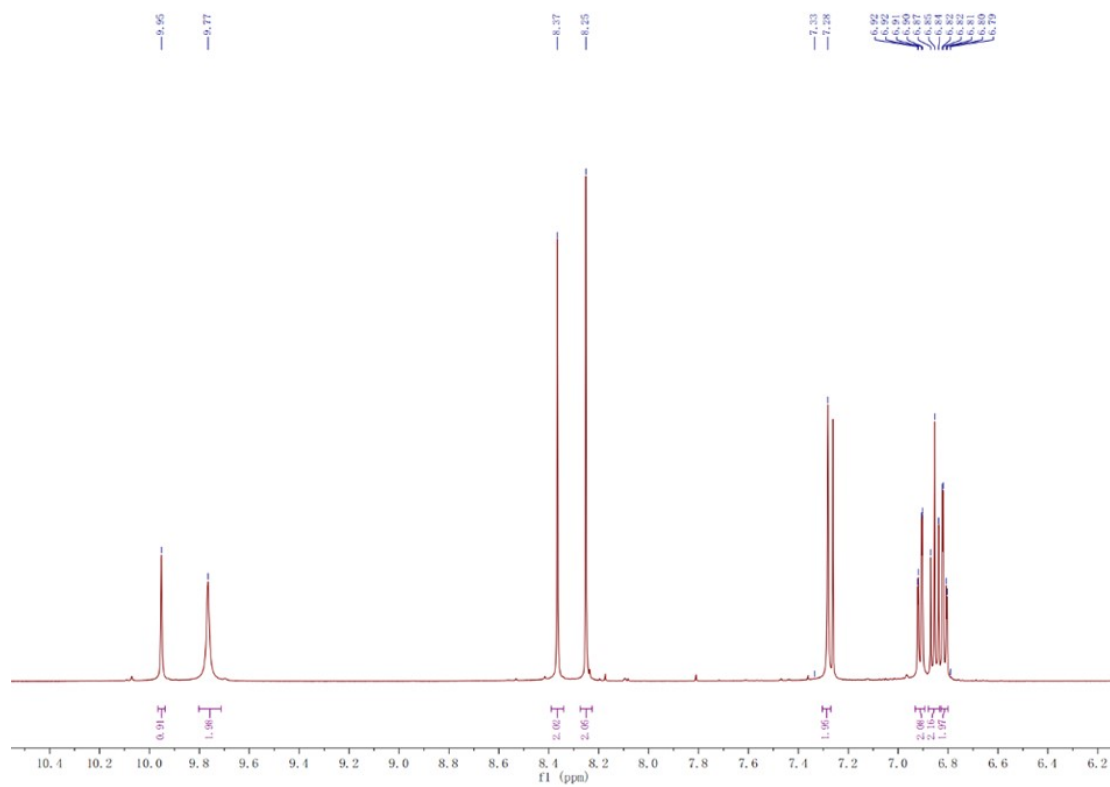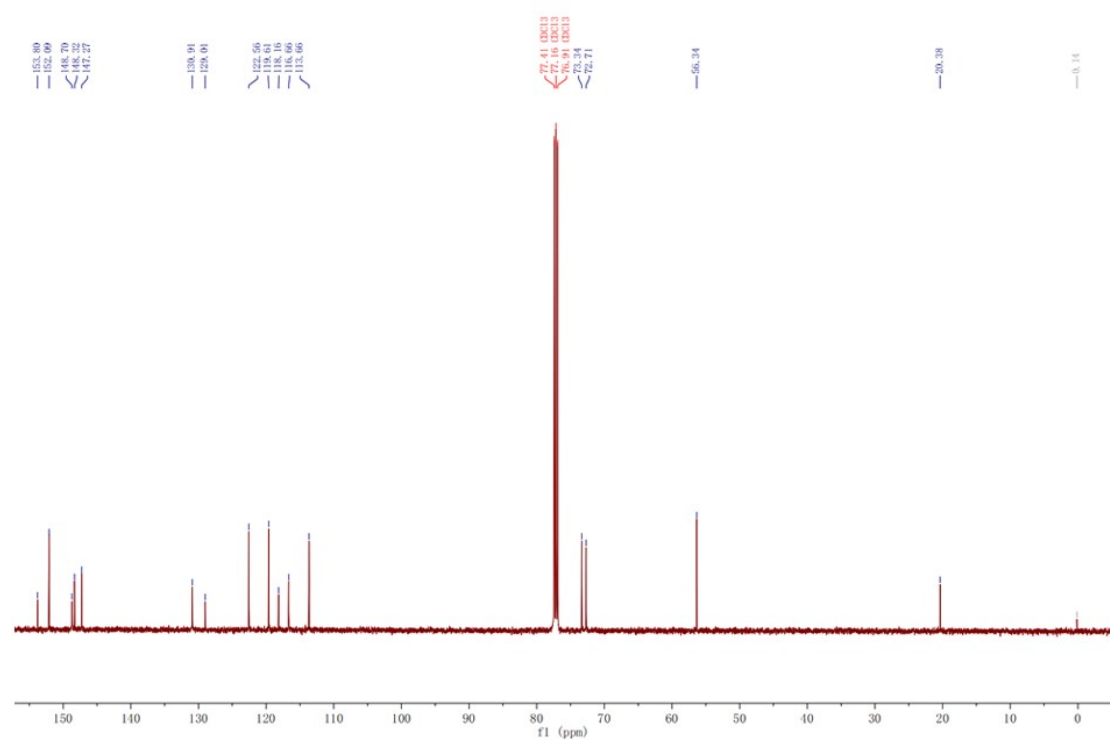

**Fig. S1.**  $^1\text{H}$  NMR spectrum of  $\text{H}_3\text{L}$  in  $\text{CDCl}_3$  (Up), and  $^{13}\text{C}$  NMR spectrum of  $\text{H}_3\text{L}$  in  $\text{CDCl}_3$  (Down).

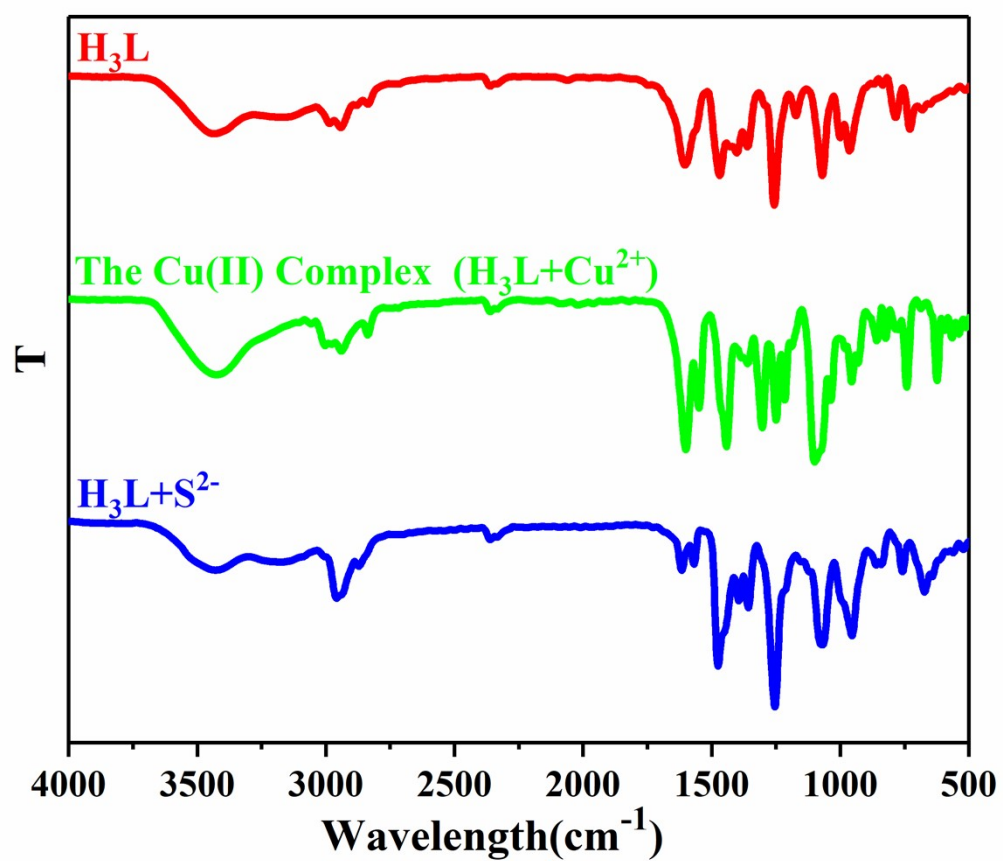

Fig. S2. Infrared spectra of chemosensor **H<sub>3</sub>L**, the Cu(II) complex, and **H<sub>3</sub>L+S<sup>2-</sup>**.

### Determination of LOD, LOQ and $K_a$ of detecting $\text{Cu}^{2+}$ .

(1) The quantitative limit and detection limits of  $\text{Cu}^{2+}$  and  $\text{H}_3\text{L}$  were determined from the fluorescence titer of the sensor  $\text{H}_3\text{L}$  and  $\text{Cu}^{2+}$ . Use the following equations to determine the LOD and LOQ.

Fit equation:  $y = -121.951x + 2311.418$   $R^2 = 0.96596$

$$S = 1.21951 \times 10^8 \quad \delta = \sqrt{\frac{\sum (F_i - \bar{F}_0)^2}{N-1}} \quad K=3$$

$$\text{LOD} = K \times \delta / S = 1.5398 \times 10^{-7} \text{ M}; (N = 15);$$

$$\text{LOQ} = 10 \times \delta / S = 4.5279 \times 10^{-7} \text{ M}.$$

Where  $N$ ,  $S$ ,  $F_0$  and  $\bar{F}$  are the number of replicates for the measurements, slope, fluorescence intensity and mean of fluorescence intensity of the blank solution of probe, respectively.

Benesi-Hildebrand equation as shown below:

$$\log (F - F_{\min}) / (F_{\max} - F) = \log K_a + 2 \log [\text{Cu}^{2+}] \quad K_a = 6.89 \times 10^9 \text{ M}^{-1}$$

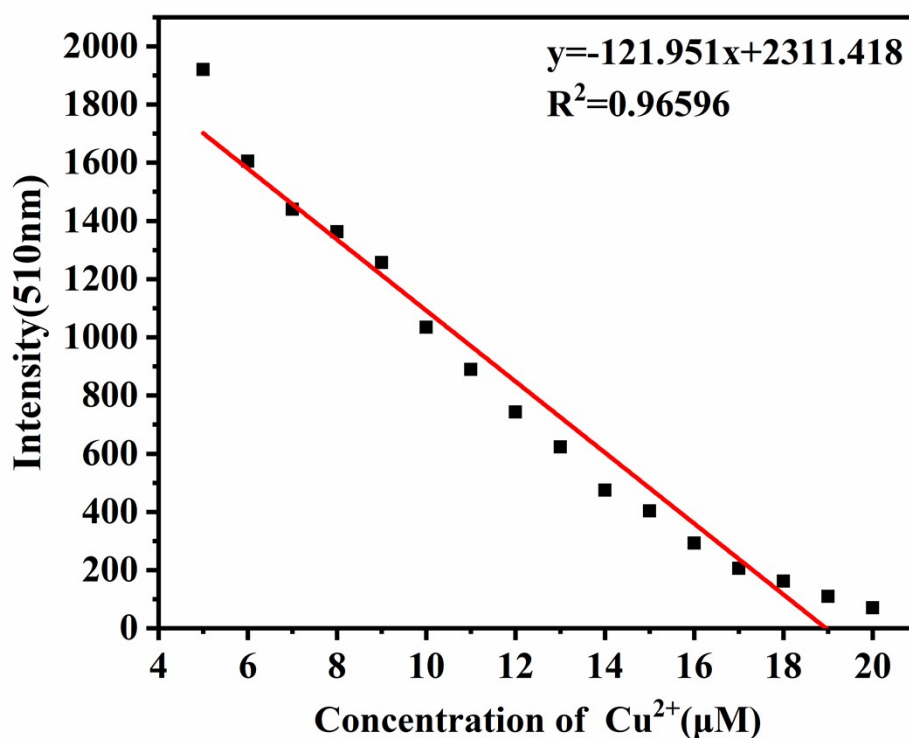

Fig. S3. Linear calibration curve of  $\text{Cu}^{2+}$ .

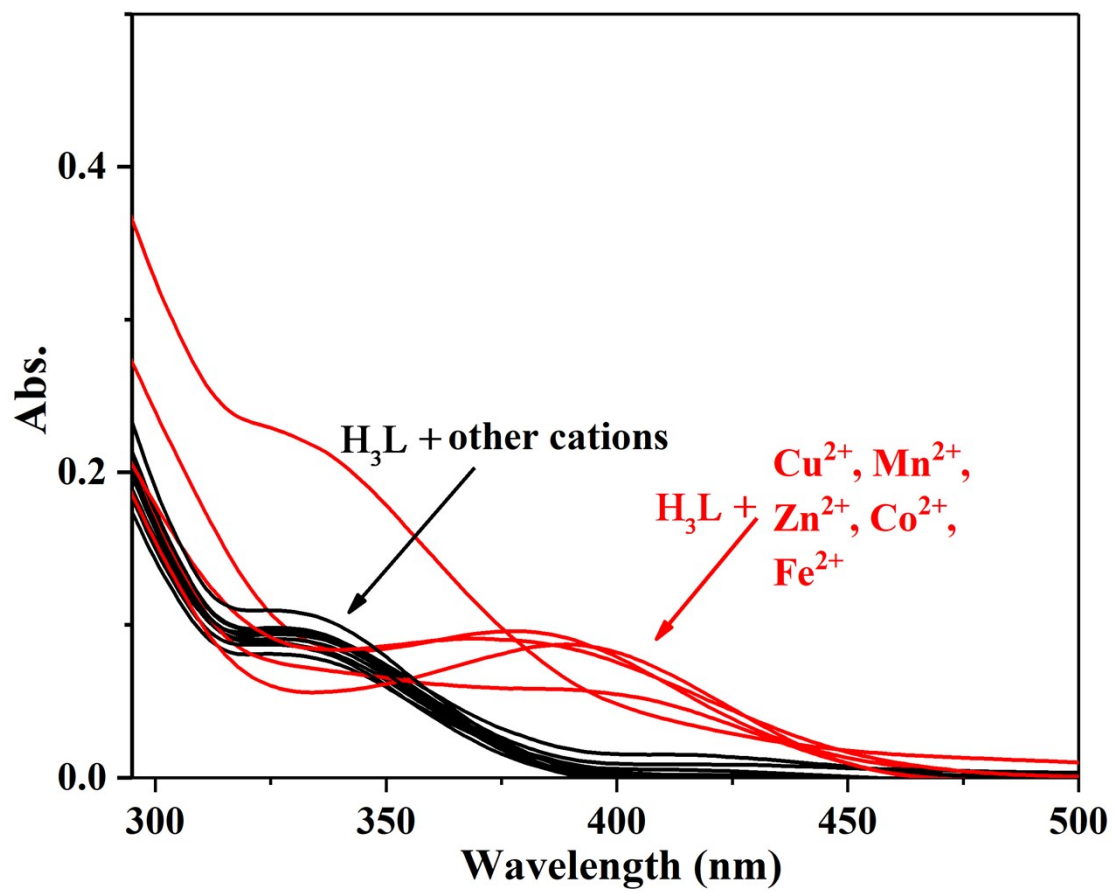

**Fig. S4.** Absorption spectra of H<sub>3</sub>L solution in the presence of various cations (Cu<sup>2+</sup>, Hg<sup>2+</sup>, Cr<sup>3+</sup>, Fe<sup>3+</sup>, Cd<sup>2+</sup>, Mn<sup>2+</sup>, Ca<sup>2+</sup>, Ag<sup>+</sup>, Na<sup>+</sup>, Li<sup>+</sup>, Zn<sup>2+</sup>, K<sup>+</sup>, Mg<sup>2+</sup>, Al<sup>3+</sup>, Fe<sup>2+</sup>, Co<sup>2+</sup>, Pb<sup>2+</sup> and Ga<sup>3+</sup>).

### Determination of LOD, LOQ and $K_a$ of detecting $S^{2-}$ .

(1) The quantitative limit and detection limits of  $S^{2-}$  and  $H_3L$  were determined from the fluorescence titer of the sensor  $H_3L$  and  $S^{2-}$ . Use the following equations to determine the LOD and LOQ.

Fit equation:  $y=138.802x+1269.301$   $R^2=0.97487$

$$S=1.38802 \times 10^8 \quad \delta = \sqrt{\frac{\sum (F_i - \bar{F}_0)^2}{N-1}} \quad K=3$$

$$\text{LOD} = K \times \delta / S = 1.7274 \times 10^{-7} \text{ M}; (N = 15);$$

$$\text{LOQ} = 10 \times \delta / S = 6.4692 \times 10^{-7} \text{ M}.$$

Where  $N$ ,  $S$ ,  $F_0$  and  $\bar{F}$  are the number of replicates for the measurements, slope, fluorescence intensity and mean of fluorescence intensity of the blank solution of probe, respectively.

Benesi-Hildebrand equation as shown below:

$$\log (F-F_{\min}) / (F_{\max}-F) = \log K_a + 2 \log [S^{2-}] \quad K_a = 1.59 \times 10^9 \text{ M}^{-1}$$

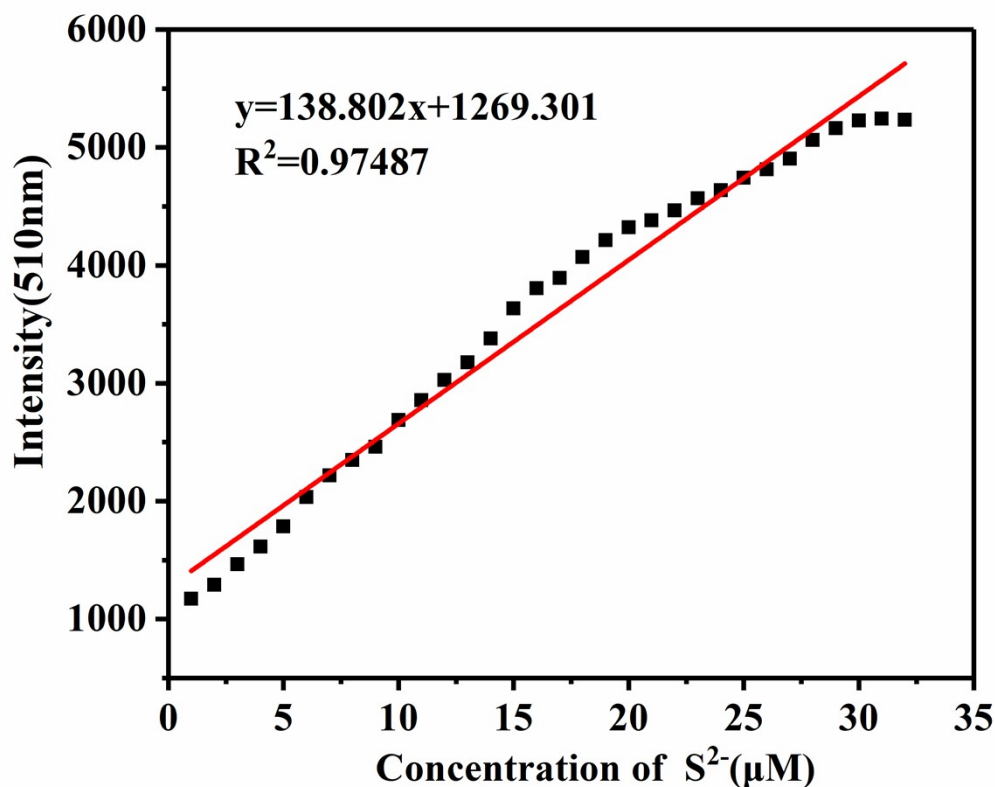

Fig. S5. Linear calibration curve of  $S^{2-}$ .

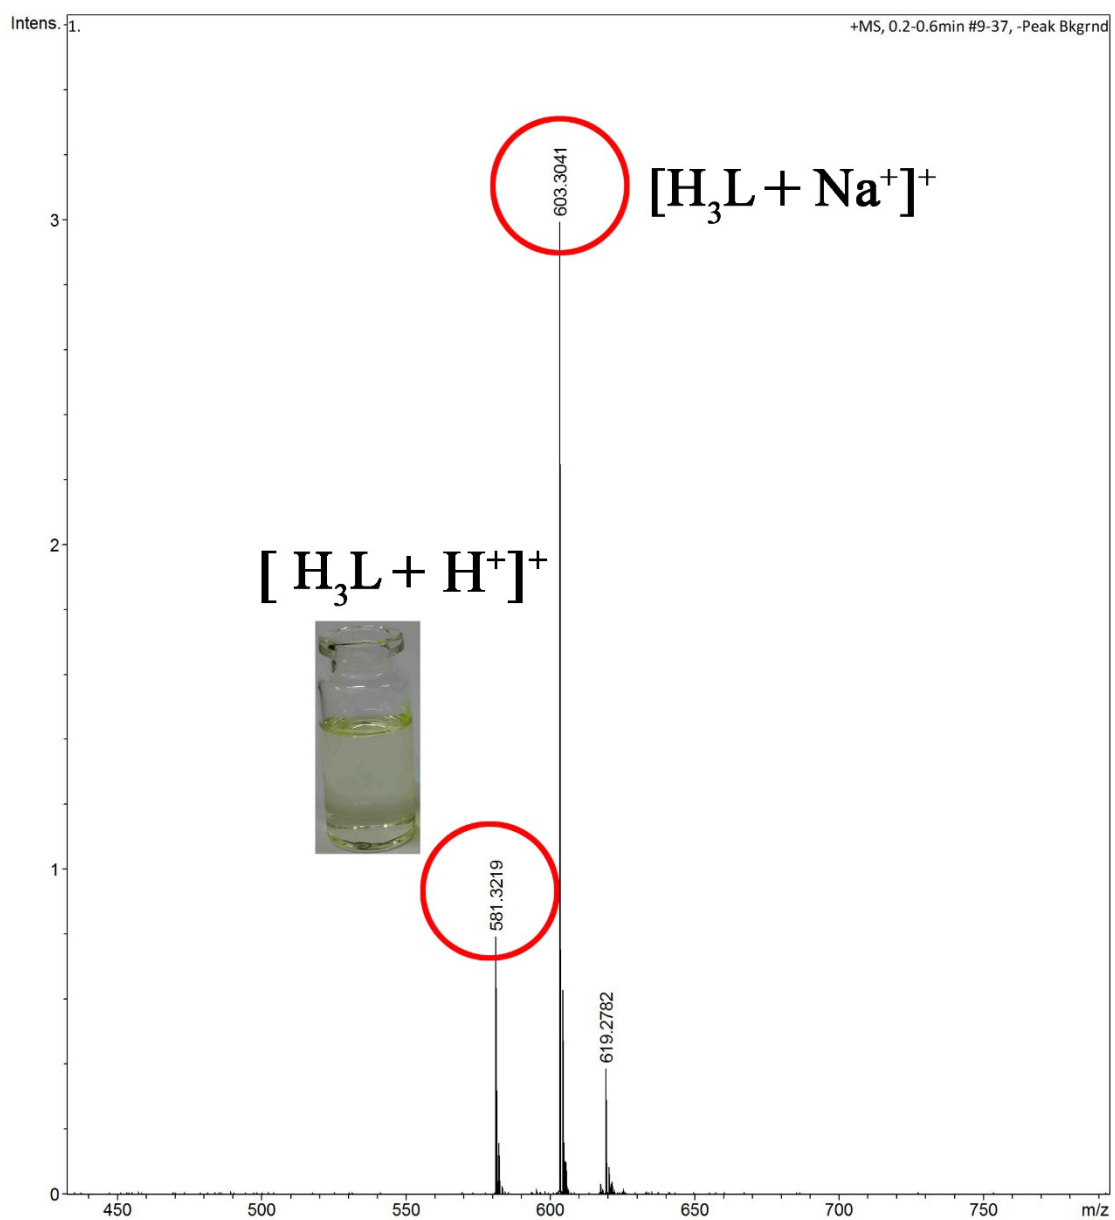

**Fig. S6.** Mass spectrum of chemosensor  $H_3L$ .

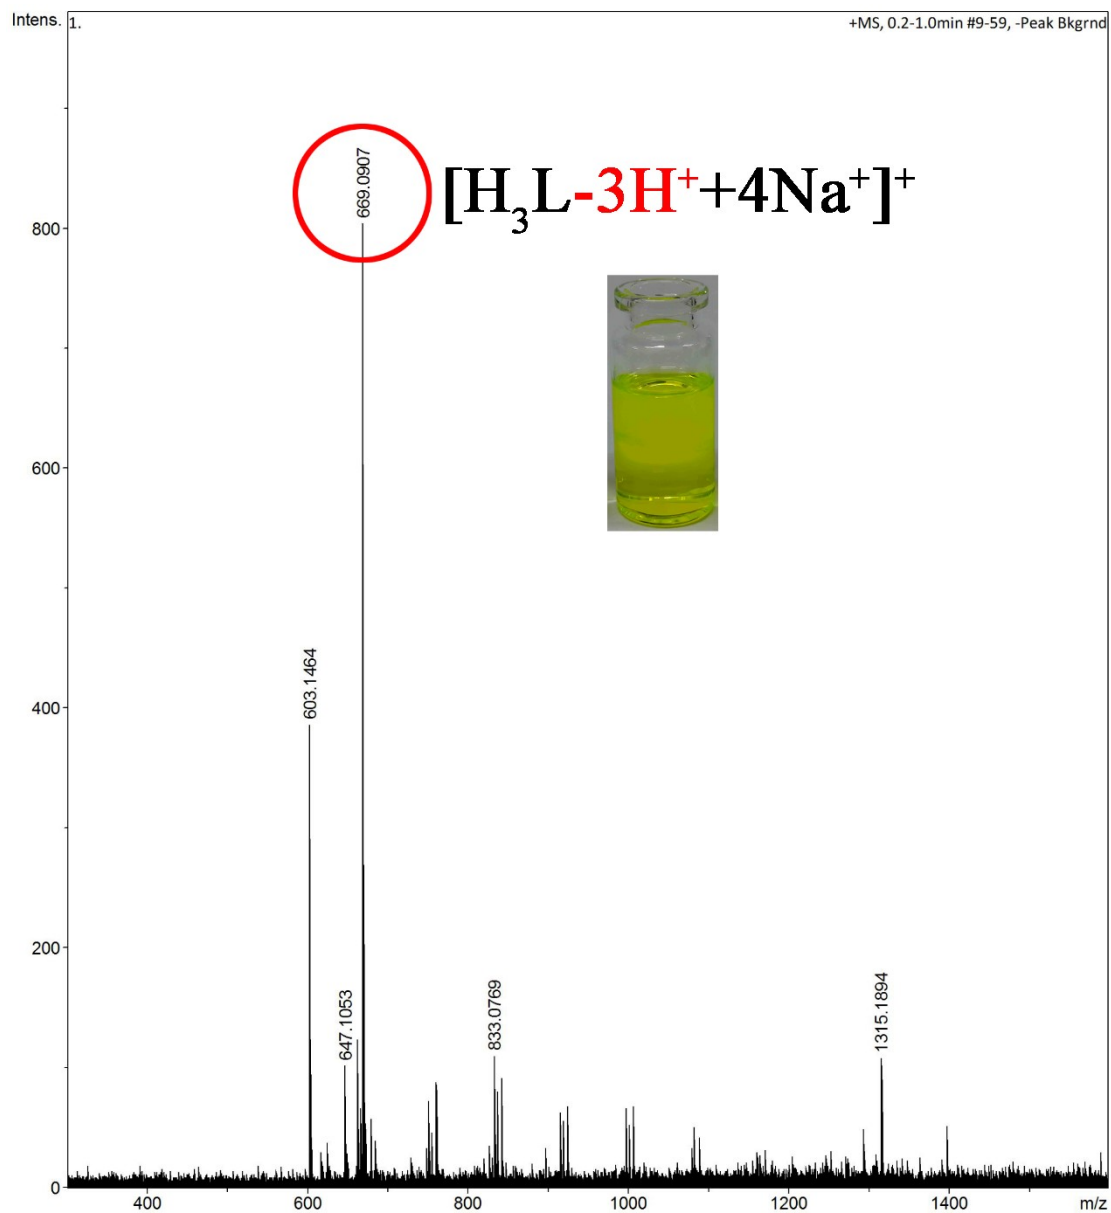

**Fig. S7.** Chemosensor  $\text{H}_3\text{L}$  recognizes  $\text{S}^{2-}$ , the color of the solution deepens obviously under natural light.



**Table S1:** Structure refinement and crystal data for the Cu(II) complex.

|                                                            |                                                                                  |
|------------------------------------------------------------|----------------------------------------------------------------------------------|
| Compound code                                              | [Cu <sub>2</sub> (L)]ClO <sub>4</sub> ·2CH <sub>3</sub> OH                       |
| CCDC number                                                | 2077985                                                                          |
| Empirical formula                                          | C <sub>31</sub> H <sub>37</sub> ClCu <sub>2</sub> N <sub>4</sub> O <sub>15</sub> |
| Molecular weight                                           | 868.17                                                                           |
| Temperature(K)                                             | 173                                                                              |
| Wavelength (Å)                                             | 0.71073                                                                          |
| Crystal system                                             | Monoclinic                                                                       |
| Space group                                                | P21/c                                                                            |
| <i>a</i> (Å)                                               | 11.3598(4)                                                                       |
| <i>b</i> (Å)                                               | 28.8890(8)                                                                       |
| <i>c</i> (Å)                                               | 10.9160(3)                                                                       |
| $\alpha^\circ$                                             | 90                                                                               |
| $\beta^\circ$                                              | 100.7080(10)                                                                     |
| $\gamma^\circ$                                             | 90                                                                               |
| Volume(Å <sup>3</sup> )                                    | 3519.96(19)                                                                      |
| Z                                                          | 4                                                                                |
| Dx (gcm <sup>-3</sup> )                                    | 1.638                                                                            |
| $\mu(mm^{-1})$                                             | 1.362                                                                            |
| F(000)                                                     | 1784                                                                             |
| Crystal size(mm <sup>3</sup> )                             | 0.19 × 0.17 × 0.16                                                               |
| $\theta$ range (°)                                         | 2.306-26.748                                                                     |
| Index ranges                                               | -13 ≤ <i>h</i> ≤ 14, -36 ≤ <i>k</i> ≤ 36, -13 ≤ <i>l</i> ≤ 13                    |
| <i>R</i> <sub>int</sub>                                    | 0.0717                                                                           |
| Data completeness                                          | 99.70%                                                                           |
| Reflns/restraints/parameters                               | 7471/235/532                                                                     |
| Final R indexes [ <i>I</i> >= 2σ( <i>I</i> )] <sup>a</sup> | <i>R</i> <sub>1</sub> = 0.0694, <i>wR</i> <sub>2</sub> = 0.1610                  |
| Final R indexes (all data) <sup>b</sup>                    | <i>R</i> <sub>1</sub> = 0.0960, <i>wR</i> <sub>2</sub> = 0.1774                  |
| Goodness-of-fit on <i>F</i> <sup>2</sup>                   | 1.069                                                                            |
| $\Delta r_{\max,\min}$ (eÅ <sup>-3</sup> )                 | 0.88 and -1.11                                                                   |

**Table S2:** Selected bond lengths (Å) and angles (°) of [Cu<sub>2</sub>(L)]ClO<sub>4</sub>·2CH<sub>3</sub>OH.

| Bond       | Bond length (Å) | Bond       | Bond length (Å) |
|------------|-----------------|------------|-----------------|
| Cu1-O2     | 1.905(4)        | Cu2-O8     | 1.897(4)        |
| Cu1-O5     | 1.960(4)        | Cu2-O5     | 1.948(3)        |
| Cu1-N1     | 1.962(4)        | Cu2-N3     | 1.964(4)        |
| Cu1-N2     | 1.964(4)        | Cu2-N4     | 1.962(4)        |
| O2-Cu1-O5  | 84.38(15)       | O8-Cu2-O5  | 82.64(15)       |
| O2-Cu1-N1  | 89.78(17)       | O8-Cu2-N3  | 166.55(16)      |
| O2-Cu1-N2  | 164.72(17)      | O8-Cu2-N4  | 90.91(17)       |
| O5-Cu1-N1  | 172.75(17)      | O5-Cu2-N3  | 85.40(16)       |
| O5-Cu1-N2  | 85.75(16)       | O5-Cu2-N4  | 173.55(17)      |
| N1-Cu1-N2  | 100.83(18)      | N4-Cu2-N3  | 101.00(17)      |
| C1-O2-Cu1  | 124.2(3)        | C24-O8-Cu2 | 127.7(3)        |
| Cu2-O5-Cu1 | 103.06(16)      | C13-O5-Cu2 | 129.2(3)        |
| C13-O5-Cu1 | 127.7(3)        | O6-N3-Cu2  | 119.0(3)        |
| O3-N1-Cu1  | 124.8(3)        | C19-N3-Cu2 | 129.3(3)        |
| C8-N1-Cu1  | 123.5(4)        | O7-N4-Cu2  | 123.7(3)        |
| O4-N2-Cu1  | 119.2(3)        | C22-N4-Cu2 | 125.8(4)        |
| C11-N2-Cu1 | 128.9(4)        |            |                 |

**Table S3:** Putative hydrogen bond interactions (Å) for the Cu(II) complex.

| D-X···A         | d(D-X) | d(X···A) | d(D···A)  | ∠D-X···A |
|-----------------|--------|----------|-----------|----------|
| O10--H10···O13  | 0.84   | 2.43     | 2.921(18) | 118      |
| O11--H11A···O15 | 0.84   | 2.5      | 3.30(2)   | 160      |
| C8--H8···O10    | 0.95   | 2.5      | 3.436(10) | 169      |
| C9--H9A···O8    | 0.99   | 2.44     | 3.392(7)  | 162      |
| C9--H9B···O4    | 0.99   | 2.29     | 3.213(6)  | 155      |
| C10--H10A···O6  | 0.99   | 2.54     | 3.342(7)  | 138      |
| C15--H15···O12  | 0.95   | 2.6      | 3.528(15) | 165      |
| C20--H20A···O4  | 0.99   | 2.59     | 3.323(7)  | 130      |
| C21--H21A···O2  | 0.99   | 2.44     | 3.417(7)  | 169      |
| C21--H21B···O6  | 0.99   | 2.35     | 3.259(6)  | 152      |
| C22--H22···O11  | 0.95   | 2.49     | 3.403(15) | 162      |
| C29--H29A···O15 | 0.98   | 2.57     | 3.538(17) | 172      |
